# Supplementary material
Source: PubMed Central journal article supplement (PMC2614749)
Supplement: 0806431105_0806431105SI.pdf [file 0806431105_0806431105SI.pdf]

# Supporting Information

Sedlák *et al.* 10.1073/pnas.0806431105

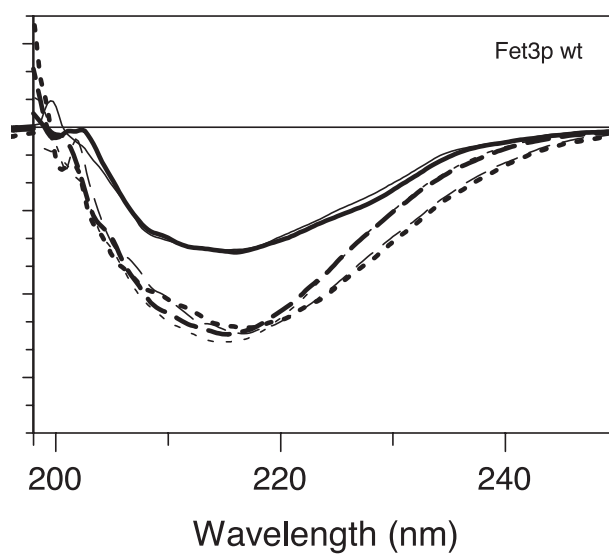

**Fig. S1.** Comparison of CD spectra before heating (solid lines) and after heating and subsequent cooling (dashed lines) and at 95 °C (dotted lines) for holo (thick lines) and apo (thin lines) forms of WT Fet3p.



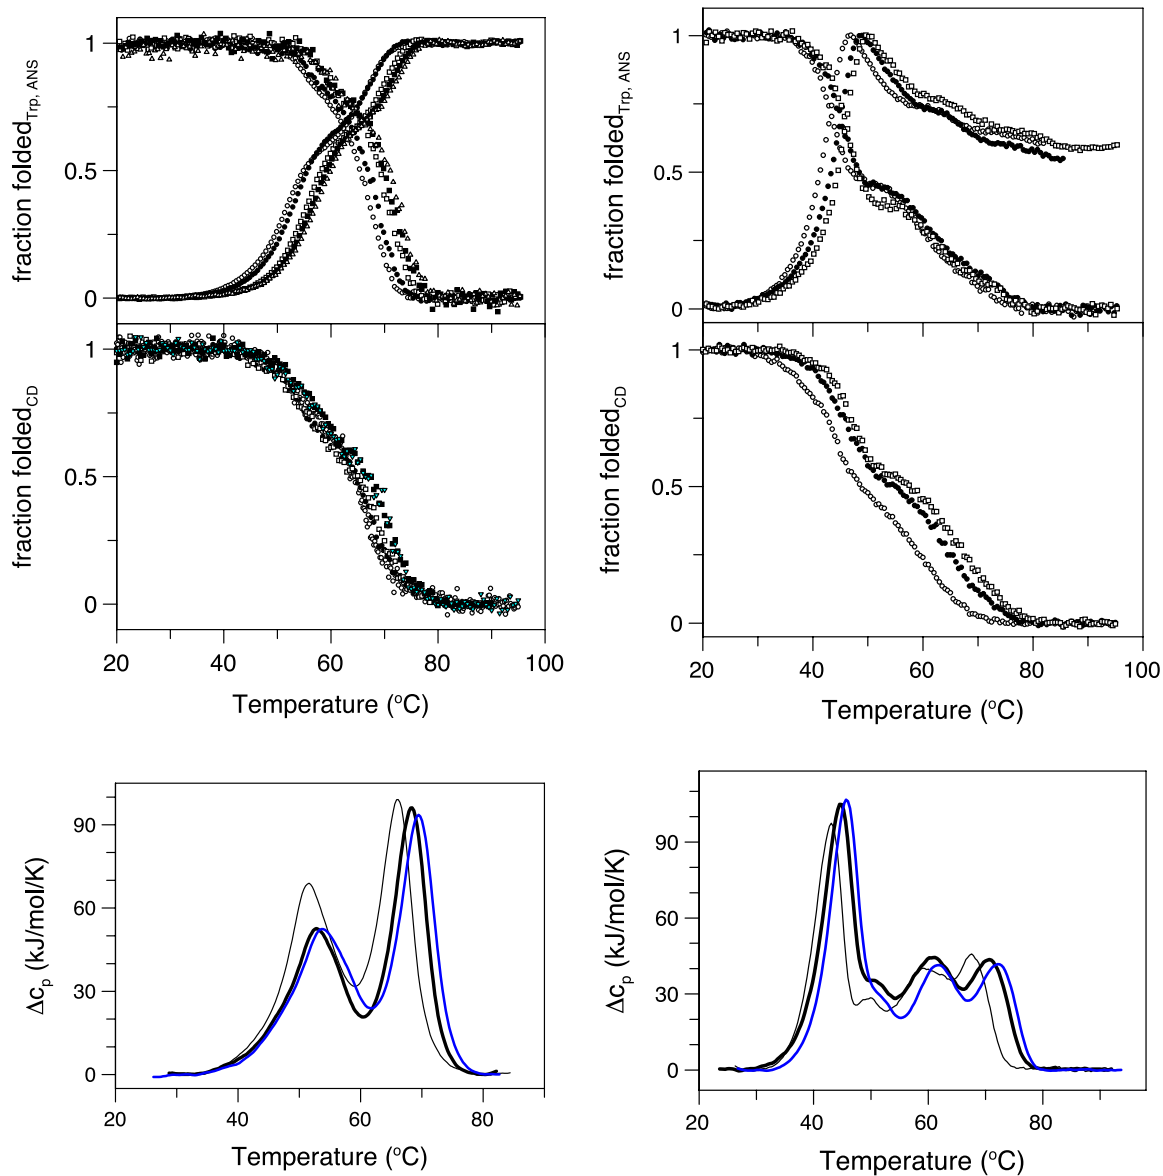

**Fig. S3.** Fluorescence (*Top*), CD (*Middle*), and DSC (*Bottom*) data for thermal unfolding of deglycosylated WT apo (*Right*) and holo (*Left*) forms at 3 different scan rates.

Table S1. Thermal data for holo and apo forms of endo H-treated WT Fet3p as determined by different detection methods (pH 7)

| Fet3p form        | Method            | Midpoint, °C | Scan rate, K/min |      |      | $E_a$ , kJ/mol |          |
|-------------------|-------------------|--------------|------------------|------|------|----------------|----------|
|                   |                   |              | 0.5              | 1.0  | 1.5  |                |          |
| Holo              | DSC               | $T_{1,trs}$  | 51.6             | 52.7 | 53.8 | 435 ± 60       |          |
|                   |                   | $T_{2, trs}$ | 65.9             | 68.3 | 69.5 | 287 ± 10       |          |
|                   | CD                | $T_{1,trs}$  | 54.9             | 55.5 | 57.3 | 319 ± 40       |          |
|                   |                   | $T_{2, trs}$ | 67.5             | 69.0 | 70.4 | 417 ± 30       |          |
|                   | Fl <sub>Trp</sub> | $T_{1,trs}$  | 57.4             | 58.5 | 60.0 | 308 ± 270      |          |
|                   |                   | $T_{2, trs}$ | 68.5             | 70.5 | 71.7 | 321 ± 10       |          |
|                   | Fl <sub>ANS</sub> | $T_{1,trs}$  | 51.8             | 53.4 | 55.8 | 290 ± 10       |          |
|                   |                   | $T_{2, trs}$ | 66.4             | 67.5 | 70.1 | 336 ± 30       |          |
|                   | Apo               | DSC          | $T_{1,trs}$      | 43.1 | 44.7 | 45.7           | 349 ± 10 |
|                   |                   |              | $T_{2, trs}$     | 59.2 | 60.7 | 61.8           | 388 ± 20 |
| $T_{3,trs}$       |                   |              | 67.6             | 70.8 | 72.2 | 224 ± 20       |          |
| CD                |                   | $T_{1, trs}$ | 44.1             | 45.7 | 46.8 | 340 ± 10       |          |
|                   |                   | $T_{2, trs}$ | -                | -    | -    | -              |          |
|                   |                   | $T_{3, trs}$ | 60.0             | 64.6 | 66.4 | 152 ± 20       |          |
| Fl <sub>Trp</sub> |                   | $T_{1, trs}$ | 43.2             | 45.0 | 45.9 | 333 ± 10       |          |
|                   |                   | $T_{2, trs}$ | 60.2             | 61.0 | 61.5 | -              |          |
|                   |                   | $T_{3, trs}$ | 70.6             | 72.6 | 74.0 | 316 ± 20       |          |
| Fl <sub>ANS</sub> |                   | $T_{1, trs}$ | 41.6             | 43.7 | 44.7 | 286 ± 20       |          |
|                   |                   | $T_{2, trs}$ | 60.0             | 61.9 | 62.8 | 353 ± 20       |          |
|                   |                   | $T_{3, trs}$ | 72.6             | 75.1 | 75.7 | 326 ± 60       |          |

Error rate in  $T_m$  is ± 0.5 °C.
